# Supplementary material
Source: publisher site journal article supplement (https://www.dovepress.com/article/319965)

**Challenges and pitfalls of using repeat spirometry recordings in routine primary care data to measure FEV1 decline in a COPD population**

**Supplementary material**

Contents

[Table E1: Population one (≥2 FEV1 measurements ≥6 months apart) 2](#_Toc75963616)

[Table E2: Population two (excluding patients with an FEV1 greater than 10, 20, or 30% of their previous FEV1) 3](#_Toc75963617)

[Table E3: Population three (excluding individual FEV1 measurements greater than 10, 20, of 30% of their previous FEV1 and subsequent FEV1) 4](#_Toc75963618)

[Table E4: Population four (excluding FEV1 measurements within 1 week of an AECOPD) 5](#_Toc75963619)

[Table E5: Population five (≥3 of 4 FEV1 measurements with ≥2 measurements ≥6 months apart) 6](#_Toc75963620)

[Table E6: Population six (≥2 FEV1 measurements with ≥6 months or 1 year between all FEV1 measurements) 7](#_Toc75963621)

[Table E7: Population seven (≥2 FEV1 measurements ≥6 months apart with ≥3 years follow-up) 8](#_Toc75963622)

[Table E8: Population eight (≥2 FEV1 measurements ≥6 months apart without linked HES data) 9](#_Toc75963623)

[Table E9: Population one estimating rate of FEV1 decline using linear regression models 10](#_Toc75963624)

[Figure E1: Distribution of FEV1 measurements included in the base population (population 1) over follow-up 11](#_Toc75963625)

# Table E1: Population one (≥2 FEV1 measurements ≥6 months apart)

| **Characteristics** | **Unadjusted** N=72,683 | **Minimally adjusted** N=72,683 | **Unadjusted with complete data** N=30,621 | **Fully adjusted** N=30,621 |
| --- | --- | --- | --- | --- |
| **Crude mean rate of FEV1 decline (ml/year)** | -17.7 (-18.4 to -16.9) | -18.0 (-18.7 to -17.2) | -12.5  (-13.9 to -11.1) | -11.6 (-13.1 to -10.1) |
| **Within patient FEV1 var (ml) (adjusted)** | 339.0 | 339.8 | 339.0 | 333.6 |
| **Follow-up length (years)** | 5.8 (3.6-8.5) | 5.8 (3.6-8.5) | 4.6 (2.9 – 6.8) | 4.6 (2.9 – 6.8) |
| **Number of FEV1 measurements (min-max)** | 4 (2-55) | 4 (2-55) | 4 (2-42) | 4 (2-42) |

Legend: Minimally adjusted for age and gender. Fully adjusted for all baseline characteristics. Var (variation).

# Table E2: Population two (excluding patients with an FEV1 greater than 10, 20, or 30% of their previous FEV1)

|  |  | **Everyone 10%** | | | **Everyone 20%** | | | | **Everyone 30%** | | | | |
| --- | --- | --- | --- | --- | --- | --- | --- | --- | --- | --- | --- | --- | --- |
| **Characteristics** | **Unadjusted** N=29,058 | **Minimally adjusted** N=29,058 | **Unadjusted with complete data** N=13,066 | **Fully adjusted** N=13,066 | **Unadjusted** N=41,879 | **Minimally adjusted** N=41,879 | **Unadjusted with complete data** N=18,348 | **Fully adjusted** N=18,348 | **Unadjusted** N=50,308 | **Minimally adjusted** N=50,308 | **Crude with complete data** N=21,755 | **Fully adjusted** N=21,755 |
| **Crude mean rate of FEV1 decline (ml/year)** | -79.4  (-80.7 to -78.2) | -79.4  (-80.7 to -78.2) | -92.4  (-94.8 to -90.1) | -94.9 (-97.5 to -92.3) | -56.5 (-57.4 to -55.6) | -57.1 (-58.0 to -56.2) | -63.6  (-65.3 to -61.9) | -64.3 (-66.1 to -62.5) | -46.9  (-47.7 to -46.1) | -46.8 (-47.6 to -46.0) | -50.3  (-51.7 to -48.8) | -51.4 (-53.0 to -49.8) |
| **Within patient FEV1 var (ml) (adjusted)** | 195.5 | 195.5 | 187.1 | 180.8 | 191.1 | 191.2 | 186.8 | 183.5 | 202.4 | 202.5 | 198.4 | 193.8 |
| **Follow-up length (years)** | 4.5 (2.8-6.9) | 4.5 (2.8-6.9) | 3.7 (2.4-5.5) | 3.7 (2.4-5.5) | 5.0 (3.0-7.6) | 5.0 (3.0-7.6) | 4 (2.6 – 6.0) | 4 (2.6 – 6.0) | 5.2 (3.2-7.9) | 5.2 (3.2-7.9) | 4.2 (2.7-6.3) | 4.2 (2.7-6.3) |
| **Number of FEV1 measurements (min-max)** | 3 (2-18) | 3 (2-18) | 3 (2-15) | 3 (2-15) | 3 (2-24) | 3 (2-24) | 3 (2-21) | 3 (2-21) | 4 (2-33) | 4 (2-33) | 3 (2-30) | 3 (2-30) |

Legend: Minimally adjusted for age and gender. Fully adjusted for all baseline characteristics. Var (variation).

# Table E3: Population three (excluding individual FEV1 measurements greater than 10, 20, of 30% of their previous FEV1 and subsequent FEV1)

|  | **10% measurements** | | | | **20% measurements** | | | | **30% measurements** | | | |
| --- | --- | --- | --- | --- | --- | --- | --- | --- | --- | --- | --- | --- |
| **Characteristics** | **Unadjusted** N=72,683 | **Minimally adjusted** N=72,683 | **Unadjusted with complete data** N=30,621 | **Fully adjusted** N=30,621 | **Unadjusted** N=72,683 | **Minimally adjusted** N=72,683 | **Unadjusted with complete date** N=30,621 | **Fully adjusted** N=30,621 | **Crude** N=72,683 | **Minimally adjusted** N=72,683 | **Unadjusted with complete data** N=30,621 | **Fully adjusted** N=30,621 |
| **Crude mean rate of FEV1 decline (ml/year)** | -17.8 (-18.6 to -17.1) | -17.9  (-18.6 to -17.1) | -11.7  (-13.2 to -10.2) | -11.6 (-13.2 to -10.0) | -18.0 (-18.8 to -17.2) | -18.1 (-18.9 to -17.4) | -12.1  (-13.5 to -10.6) | -10.9 (-12.4 to -9.3) | -18.2  (-19.0 to -17.5) | -18.3 (-19.0 to -17.5) | -12.3 (-13.8 to -10.9) | -12.3 (-13.9 to -10.7) |
| **Within patient FEV1 var (ml) (adjusted)** | 294.2 | 295.1 | 297.2 | 289.0 | 294.1 | 295.0 | 297.1 | 291.6 | 298.2 | 299.1 | 300.8 | 293.5 |
| **Follow-up length (years)** | 5.8 (3.6-8.5) | 5.8 (3.6-8.5) | 4.6 (2.9-6.8) | 4.6 (2.9-6.8) | 5.8 (3.6-8.5) | 5.8 (3.6-8.5) | 4.6 (3.0- 6.8) | 4.6 (3.0- 6.8) | 5.8 (3.6-8.5) | 5.8 (3.6-8.5) | 4.6 (2.9-6.8) | 4.6 (2.9-6.8) |
| **Number of FEV1 measurements (min-max)** | 4 (3-55) | 4 (3-55) | 4 (3-42) | 4 (3-42) | 4 (2-55) | 4 (2-55) | 4(2-42) | 4(2-42) | 4 (3-55) | 4 (2-55) | 4 (2-42) | 4 (2-42) |

Legend: Minimally adjusted for age and gender. Fully adjusted for all baseline characteristics. Var (variation).

# Table E4: Population four (excluding FEV1 measurements within 1 week of an AECOPD)

| **Characteristics** | **Unadjusted** N=70,887 | **Minimally adjusted** N=70,887 | **Unadjusted with complete data** N=29,924) | **Fully adjusted** N=29,924 |
| --- | --- | --- | --- | --- |
| **Crude mean rate of FEV1 decline (ml/year)** | -17.2  (-17.9 to -16.4) | -17.5 (-18.2 to -16.8) | -12.0 (-13.5 to -10.6) | -11.2  (-12.7 to -9.7) |
| **Within patient FEV1 var (ml) (adjusted)** | 335.9 | 336.8 | 335.6 | 330.2 |
| **Follow-up length (years)** | 5.8 (3.6-8.5) | 5.8 (3.6-8.5) | 4.7 (3.0 – 6.8) | 4.7 (3.0 – 6.8) |
| **Number of FEV1 measurements (min-max)** | 4 (2-40) | 4 (2-40) | 4 (2-26) | 4 (2-26) |

Legend: Minimally adjusted for age and gender. Fully adjusted for all baseline characteristics. Var (variation).

# Table E5: Population five (≥3 of 4 FEV1 measurements with ≥2 measurements ≥6 months apart)

|  | **At least 4 measurements** | | | | **At least 3 measurements** | | | |
| --- | --- | --- | --- | --- | --- | --- | --- | --- |
| **Characteristics** | **Unadjusted** N=44,673 | **Minimally adjusted** N=44,673 | **Unadjusted with complete data** N=17,350 | **Fully adjusted** N=17,350 | **Unadjusted** N=58,121 | **Minimally adjusted** N=58,121 | **Unadjusted with complete data** N=23,696 | **Fully adjusted** N=23,696 |
| **Crude mean rate of FEV1 decline (ml/year)** | -16.4 (-17.2 to -15.5) | -16.5 (-17.3 to -15.7) | -11.5 (-13.0 to -10.0) | -11.1 (-12.7 to -9.5) | -17.3 (-18.0 to -16.5) | -17.2  (-18.0 to -16.5) | -11.8 (-13.2 to -10.3) | -11.8 (-13.4 to -10.2) |
| **Within patient FEV1 var (ml) (adjusted)** | 337.4 | 338.2 | 336.4 | 333.0 | 338.6 | 339.4 | 338.2 | 331.7 |
| **Follow-up length (years)** | 7.2 (5.2 – 9.5) | 7.2 (5.2 – 9.5) | 6.0 (4.4 – 8.0) | 6.0 (4.4 – 8.0) | 6.5 (4.3 – 9.0) | 6.5 (4.3 – 9.0) | 5.3 (3.7 – 7.4) | 5.3 (3.7 – 7.4) |
| **Number of FEV1 measurements (min-max)** | 6 (4-55) | 6 (4-55) | 5 (4-42) | 5 (4-42) | 5 (3-55) | 5 (3-55) | 5 (3-42) | 5 (3-42) |

Legend: Minimally adjusted for age and gender. Fully adjusted for all baseline characteristics. Var (variation).

# Table E6: Population six (≥2 FEV1 measurements with ≥6 months or 1 year between all FEV1 measurements)

|  | **At least 6 months apart** | | | | **At least 1 year apart** | | | |
| --- | --- | --- | --- | --- | --- | --- | --- | --- |
| **Characteristics** | **Unadjusted** N=72,683 | **Minimally adjusted** N=72,683 | **Unadjusted with complete data** N=30,621 | **Fully adjusted** N=30,621 | **Unadjusted** N=65,875 | **Minimally adjusted** N=65,875 | **Unadjusted with complete data** N=26,556 | **Fully adjusted** N=26,566 |
| **Crude mean rate of FEV1 decline (ml/year)** | -16.8 (-17.6 to -16.1) | -17.1 (-17.9 to -16.4) | -11.4 (-12.9 to -10.0) | -10.1  (-11.7 to -8.6) | -16.9 (-17.7 to -16.1) | -17.2  (-18.0 to -16.4) | -11.2 (-12.7 to -9.6) | -9.8 (-11.5 to -8.1) |
| **Within patient FEV1 var (ml) (adjusted)** | 341.8 | 342.9 | 341.7 | 334.2 | 348.9 | 350.7 | 346.3 | 333.5 |
| **Follow-up length (years)** | 5.8 (3.6 to 8.5) | 5.8 (3.6 to 8.5) | 4.6 (2.9-6.8) | 4.6 (2.9-6.8) | 6.2 (4.0 to 8.8) | 6.2 (4.0 to 8.8) | 5.0 (3.4 – 7.2) | 5.0 (3.4 – 7.2) |
| **Number of FEV1 measurements (min-max)** | 4 (2-17) | 4 (2-17) | 3 (2-15) | 3 (2-15) | 3 (2-11) | 3 (2-11) | 3 (2-10) | 3 (2-10) |

Legend: Minimally adjusted for age and gender. Fully adjusted for all baseline characteristics. Var (variation).

# Table E7: Population seven (≥2 FEV1 measurements ≥6 months apart with ≥3 years follow-up)

| **Characteristics** | **Unadjusted** N=59,185 | **Minimally adjusted** N=59,185 | **Unadjusted with complete data** N=22,627 | **Fully adjusted** N=22,627 |
| --- | --- | --- | --- | --- |
| **Mean rate of FEV1 decline (ml/year)** | -17.7 (-18.4 to -16.9) | -17.7 (-18.4 to -16.9) | -12.2 (-13.6 to -10.7) | -12.1 (-13.7 to -10.5) |
| **Within patient FEV1 var (ml)** | 337.2 | 338.0 | 336.4 | 329.4 |
| **Follow-up length (years)** | 6.7 (4.8 – 9.1) | 6.7 (4.8 – 9.1) | 5.6 (4.3- 7.6) | 5.6 (4.3- 7.6) |
| **Number of FEV1 measurements (min-max)** | 5 (2-55) | 5 (2-55) | 5 (2-42) | 5 (2-42) |

Legend: Minimally adjusted for age and gender. Fully adjusted for all baseline characteristics. Var (variation).

# Table E8: Population eight (≥2 FEV1 measurements ≥6 months apart without linked HES data)

| **Characteristics** | **Unadjusted** N=125,682 | **Minimally adjusted** N=125,682 | **Unadjusted with complete data** N=67,391 | **Fully adjusted** N=67,391 |
| --- | --- | --- | --- | --- |
| **Mean rate of FEV1 decline (ml/year)** | -18.6  (-19.1 to -18.0) | -18.7 (-19.3 to -18.2) | -14.0 (-15.0 to -13.1) | -14.6  (-15.7 to -13.6) |
| **Within patient FEV1 var (ml)** | 329.9 | 330.6 | 330.7 | 324.0 |
| **Follow-up length (years)** | 5.9 (3.6 – 8.8) | 5.9 (3.6 – 8.8) | 4.8  (3.0 – 7.1) | 4.8  (3.0 – 7.1) |
| **Number of FEV1 measurements (min-max)** | 5 (2-55) | 5 (2-55) | 4.5 (2-42) | 4.5 (2-42) |

Legend: Minimally adjusted for age and gender. Fully adjusted for all baseline characteristics. Var (variation).

# Table E9: Population one estimating rate of FEV1 decline using linear regression models

| **Characteristics** | **Unadjusted** N=72,683 | **Minimally adjusted** N=72,683 | **Unadjusted with complete data** N=30,621 | **Fully adjusted** N=30,621 |
| --- | --- | --- | --- | --- |
| **Crude mean rate of FEV1 decline (ml/year)** | -18.6  (-19.1 to -18.0) | -18.6 (-19.2 to -17.9) | -17.7 (-19.3 to -16.2) | -21.6 (-22.6 to -20.5) |

Legend: Minimally adjusted for age and gender. Fully adjusted for all baseline characteristics.

# Figure E1: Distribution of FEV1 measurements included in the base population (population 1) over follow-up


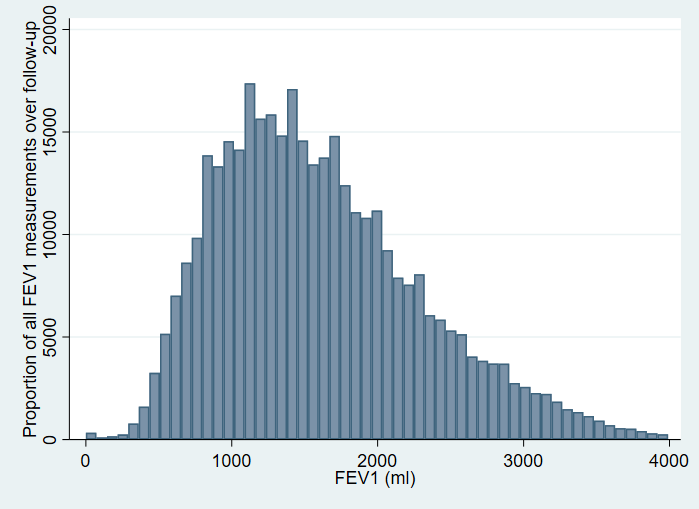

Supplement: Supplementary file 1 [file get_supplementary_file.php]
